# Supplementary figures and images for: Sequencing and Analysis of the Mitochondrial Genome of Aedes aegypti (Diptera: Culicidae) from the Brazilian Amazon Region
Source: MDPI journal article supplement (doi:10.3390/insects14120938), 2023-12-11

Supplementary figure 1 - Secondary sctructures of tRNAs and rRNAs of *Aedes aegypti* OR350416

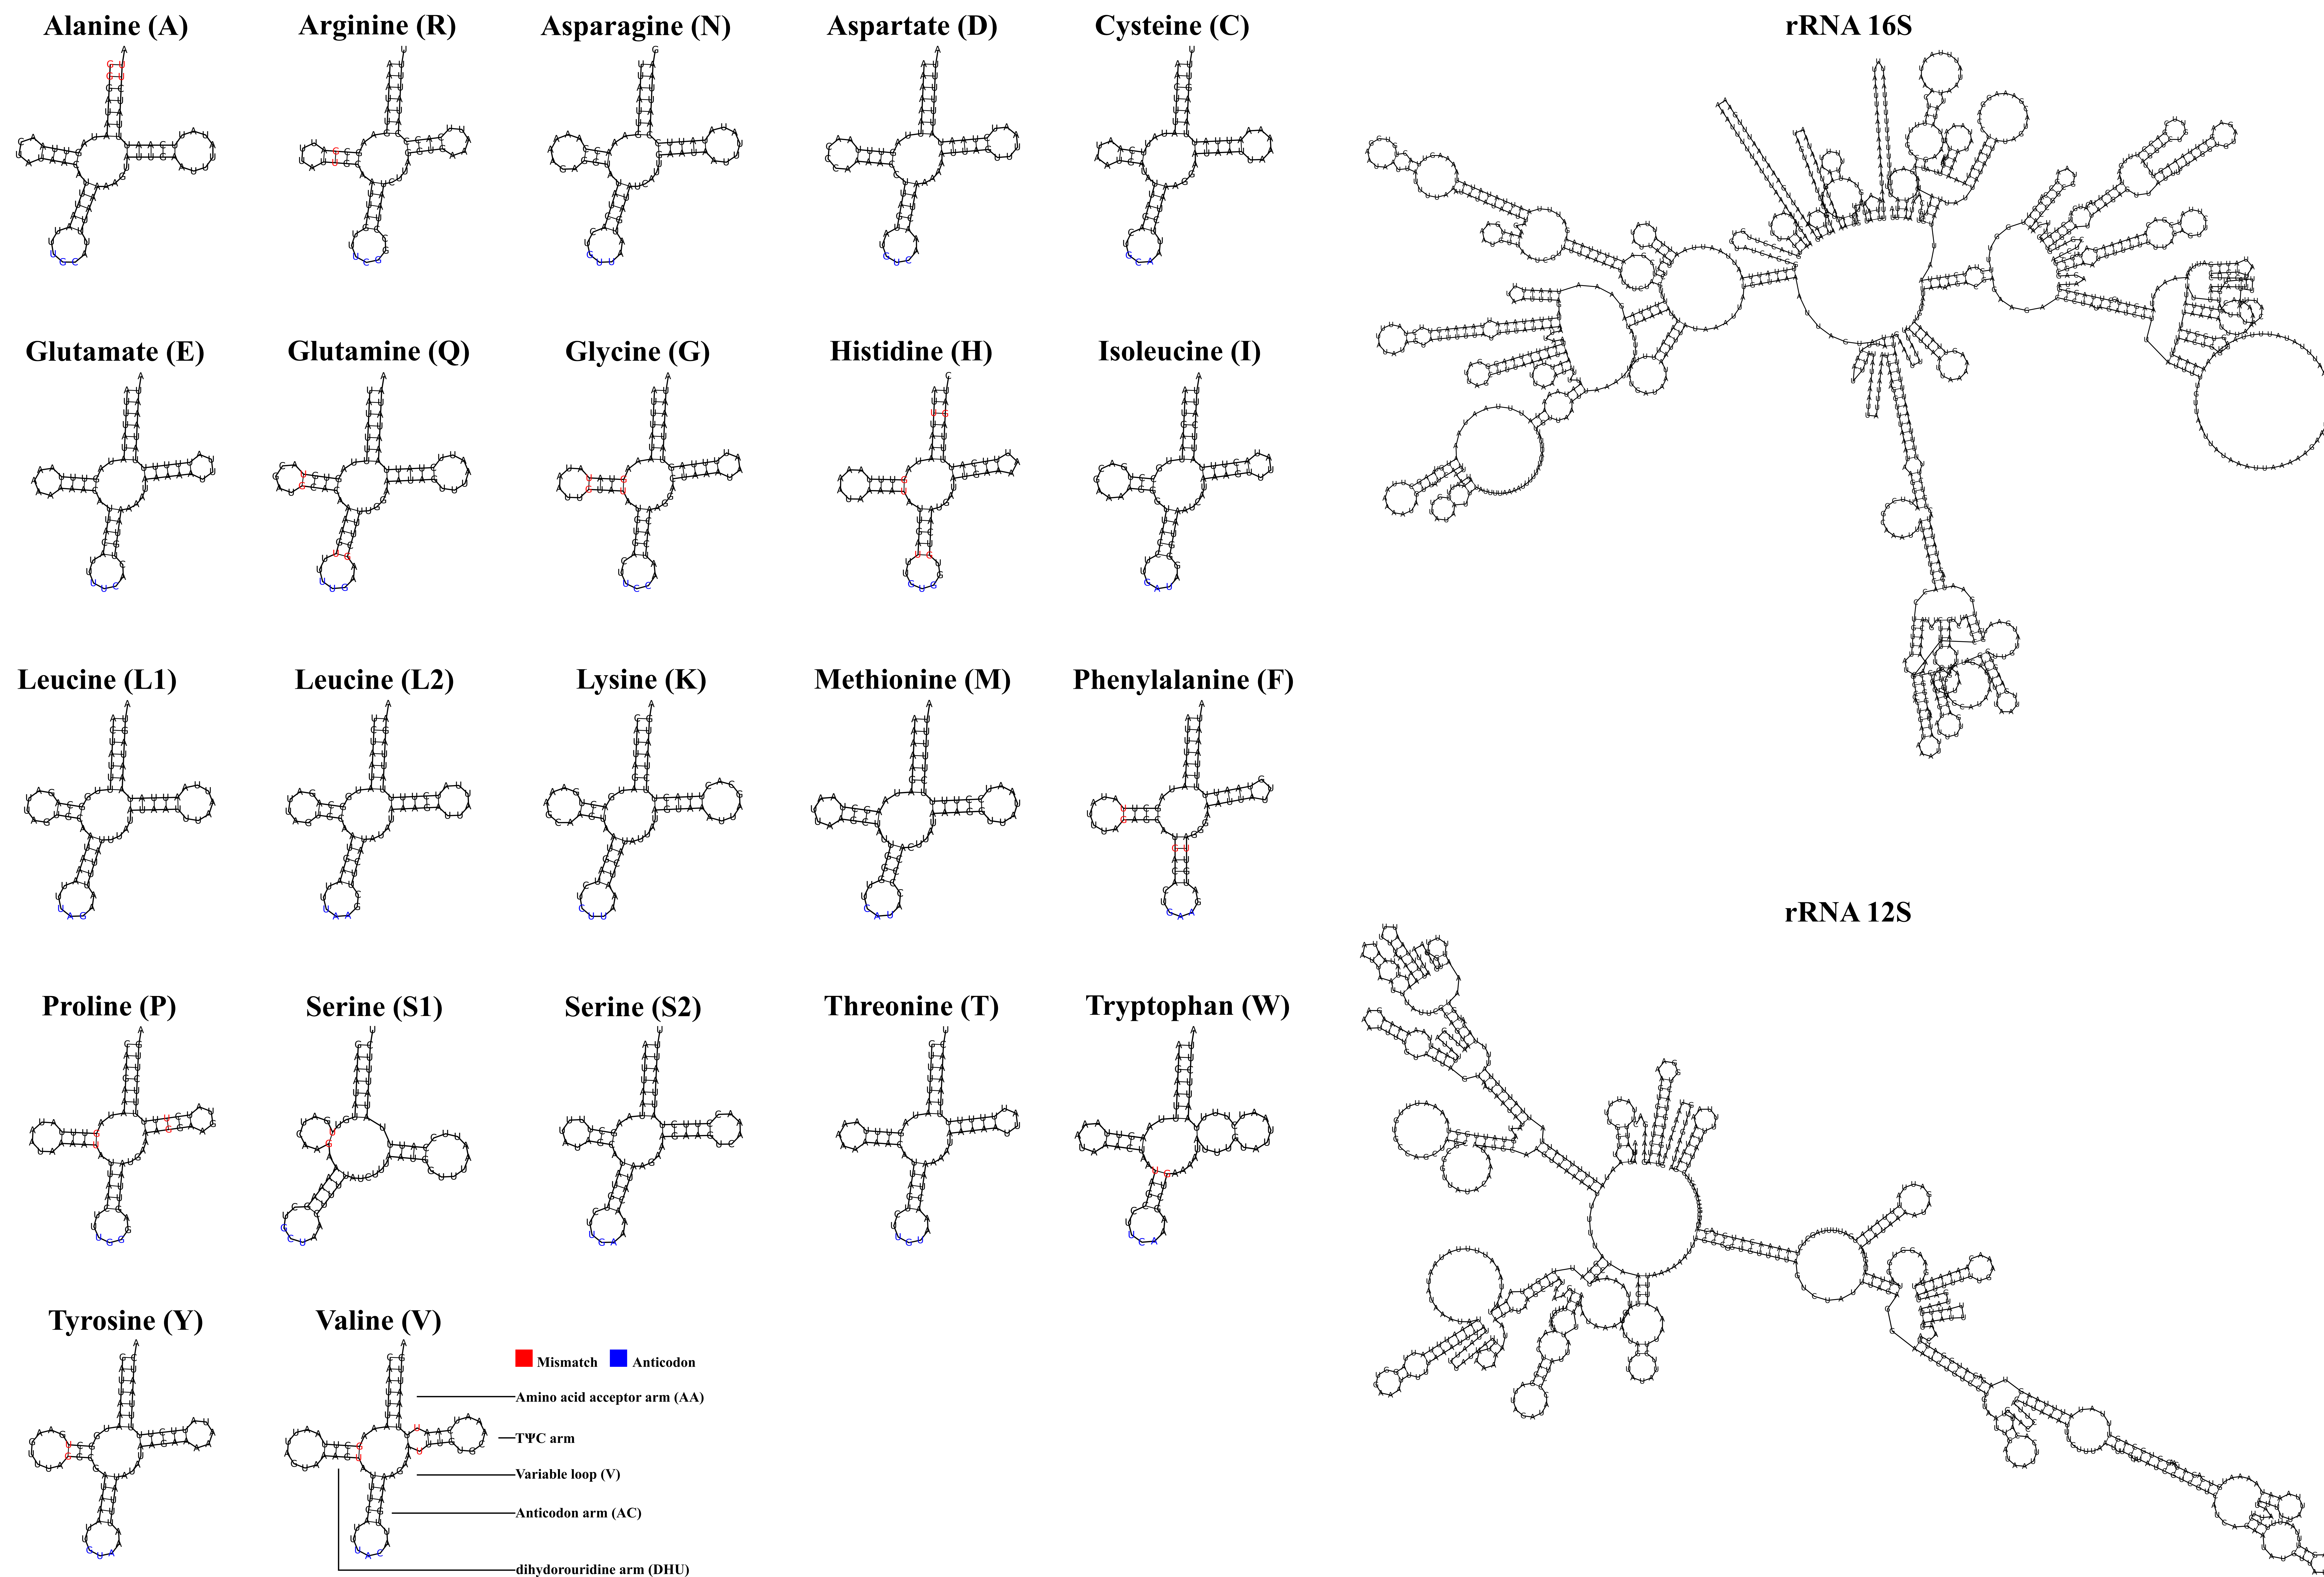

Supplement: s1 [file s1]
